# Supplementary material
Source: PubMed Central journal article supplement (PMC4571974)

**Supplemental data for Tikhanovich et al, “Dynamic arginine methylation of TNF receptor associated factor 6 regulates Toll-like receptor signaling.”**

**Table S1. PCR primers.**

**Figure S1. Sites of TRAF6 arginine methylation.**

**Legend to Figure S1.**

Mass spectrometry analysis of TRAF6 purified from Huh 7.5 cells. MS-MS spectra of methylated peptides for each site with highest A-scores.

**Table S1.** PCR primers

| Gene                                           | Assay ID       | Amplicon Sequence                                                                                                                                                                                                             |
|------------------------------------------------|----------------|-------------------------------------------------------------------------------------------------------------------------------------------------------------------------------------------------------------------------------|
| <b>Mouse</b>                                   |                |                                                                                                                                                                                                                               |
| interleukin-1 receptor-associated kinase 3     | qMmuCID0005211 | GGGAAGCTGGGAATGGAAGCTCGTGATGCGTCTGCACTGAAGGAGTC<br>CAGCTTACTCCATAGTTGATGATTAAGTGGATAGCTCGTTGATGCCCA                                                                                                                           |
| TNF-alpha                                      | qMmuCID0020352 | CCCGCATTGTAGGACAGCTGGGTCACGATCATCTTGCTGCAGGAAGGA<br>CAGCACATCTGGACGGGGCGGTCATAGAAGGAGACAGGCTGCTGCACA<br>TAAACGGTCTGCACGGCAATTGCGTTGGCGTTGGGGACAGGCACAGGC<br>TGGGTGTAGTACGAAGGTGGATTTCATCCCTTCCCATCTGGGCCTGTAA<br>TGAGCCCTGTGG |
| tumor necrosis factor, alpha-induced protein 3 | qMmuCID0007989 | GTGTGTCTGCTGATGCCATTTTGACCAAGTTGTCCCATTGTCATTCCAG<br>TTCCGAGTGTGCTAGCAAAGTCCTGTTCCACAAAATTCCTGAG                                                                                                                              |
| interleukin 6                                  | qMmuCID0005613 | ACAAGAAAGACAAAGCCAGAGTCCTTCAGAGAGATACAGAAACTCTAA<br>TTCATATCTCAACCAAGAGGTAAGATTTACATAAAATAGTCCTTCC<br>TACCCCAATTTCCAATGCTCTCCTAACAGATAAGCTGGAGTCACA                                                                           |
| actin, beta                                    | qMmuCED0027505 | TGCTCGAAGTCTAGAGCAACATAGCACAGCTTCTCTTTGATGTCACGCA<br>CGATTTCCCTCTCAGCTGTGGTGGTGAAGCTGTAGCCACGCTCGGTCAG<br>GATCTTCATGAGGTAGTCTGTCAGGTCCCAGCCAGCCAGGT                                                                           |
| <b>Human</b>                                   |                |                                                                                                                                                                                                                               |
| actin, beta                                    |                | GTGCTCGATGGGGTACTTCAG<br>TGATGGTGGGCATGGGTCAG                                                                                                                                                                                 |
| interleukin 6                                  |                | TGAGGAGACTTGCCCTGGTGA<br>CACAGCTCTGGCTTGTTCCT                                                                                                                                                                                 |
| interleukin-1 receptor-associated kinase 3     |                | CAACGTTCAACCATGCTCGG<br>TTTACTGCTGCTGCTGGTCA                                                                                                                                                                                  |
| TNF-alpha                                      |                | GGAGAAGGGTGACCGACTCA<br>GTCCTCCTCACAGGGCAATG                                                                                                                                                                                  |
| C-reactive protein                             |                | TGGTCCTGCTAGGAACACGTA<br>GCCACAAGAGTGGACGTGAA                                                                                                                                                                                 |
| intercellular adhesion molecule 1              |                | CCATGGTACCTGCACACCTA<br>TGTCTTGAGTCTTGCTCCTTCC                                                                                                                                                                                |
| tumor necrosis factor, alpha-induced protein 3 |                | GGTGTGCGAGAAGTCCGGAAG<br>CTGAACGCCCCACATGTACT                                                                                                                                                                                 |
| PRMT1                                          |                | CAGGCGAAAGCAGTGAGAA<br>GATGCCAAAGTGTGCGTAGG                                                                                                                                                                                   |
| TLR4                                           |                | TATTGCACAGACTTGCGGGT<br>TGCACCTGGTTGGATAAAGT                                                                                                                                                                                  |

# Figure S1

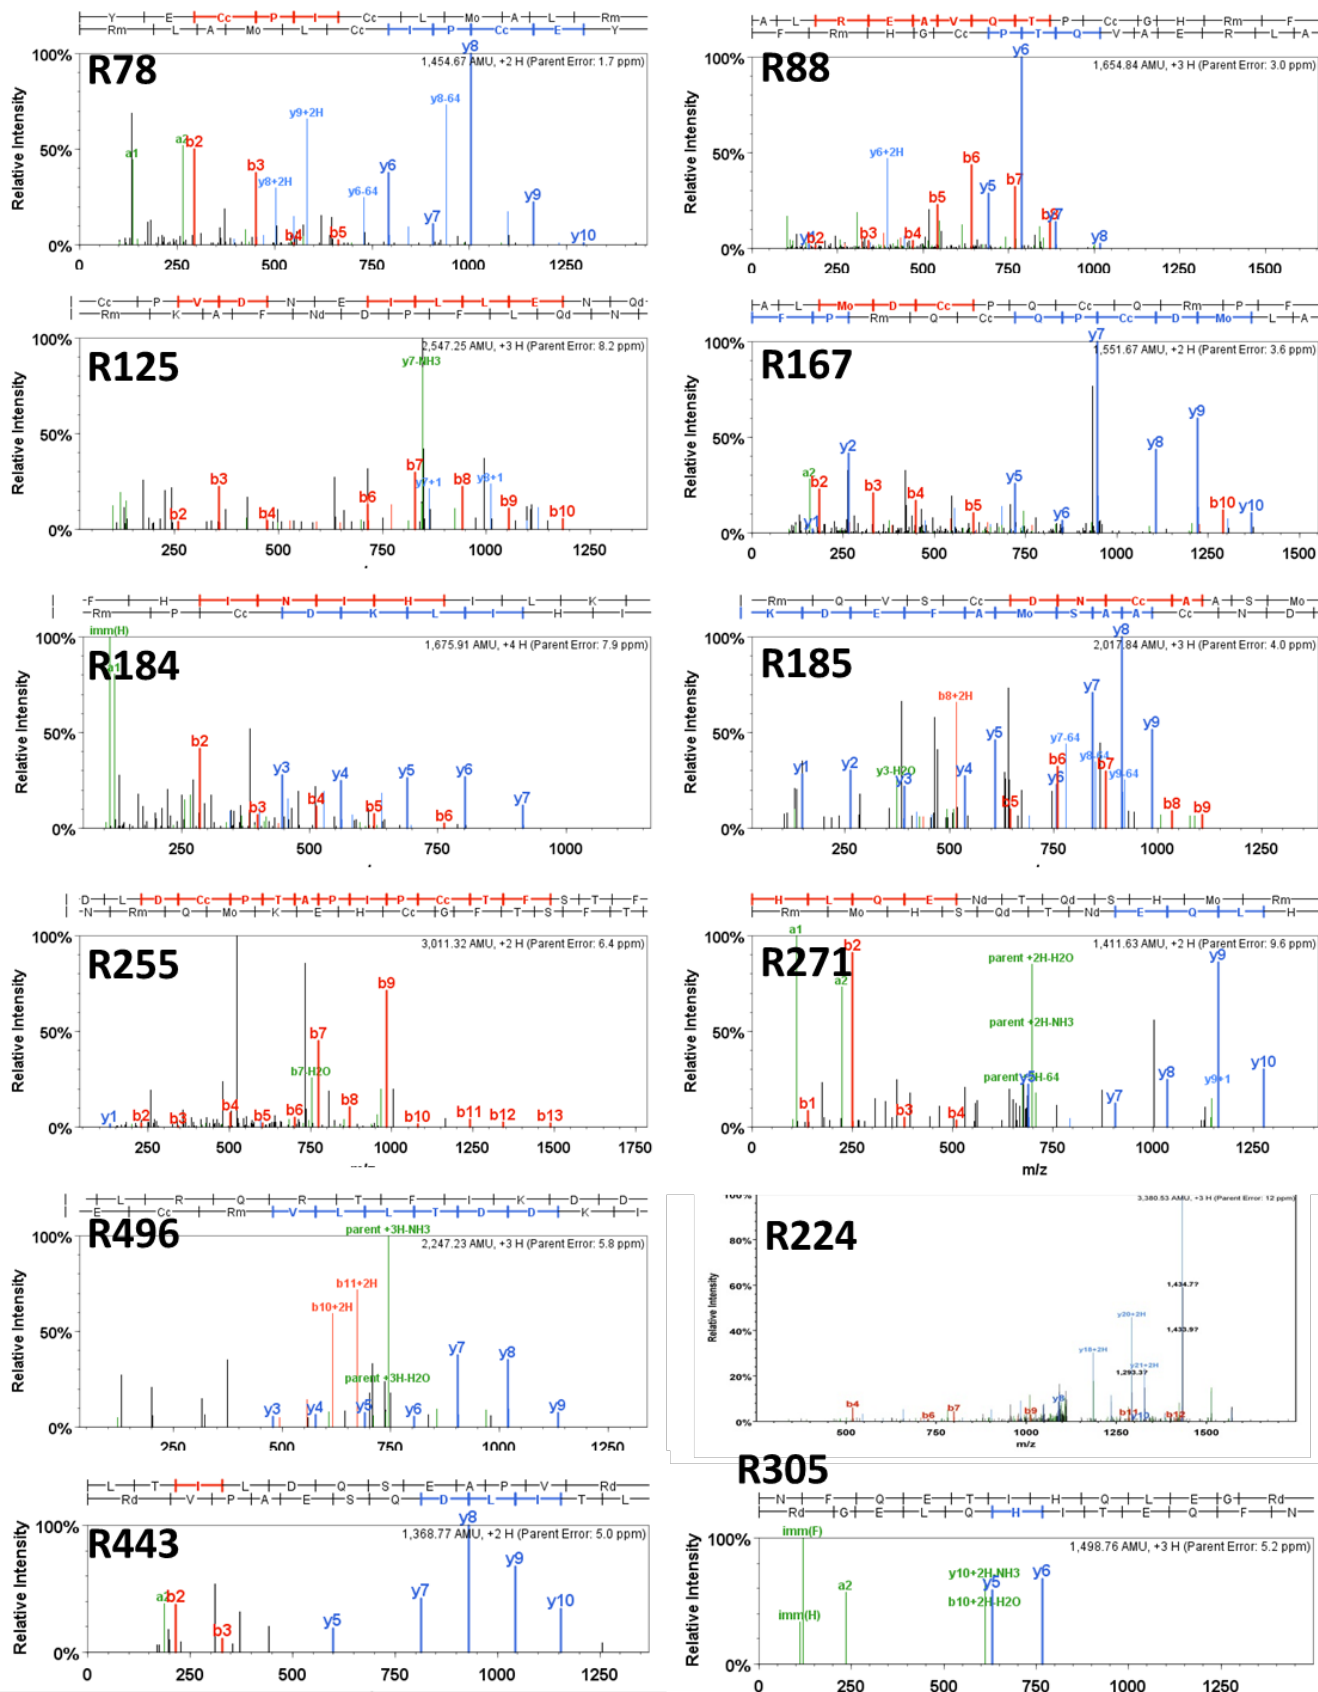

Supplement: supp_M115.653543_Supplemental_data_for_Tikhanovich_et_al.pdf [file supp_M115.653543_Supplemental_data_for_Tikhanovich_et_al.pdf]
